# Supplementary material
Source: PubMed Central journal article supplement (PMC6205399)
Supplement: jci-128-96268-s273.pdf [file jci-128-96268-s273.pdf]

**Supplementary Figures:**

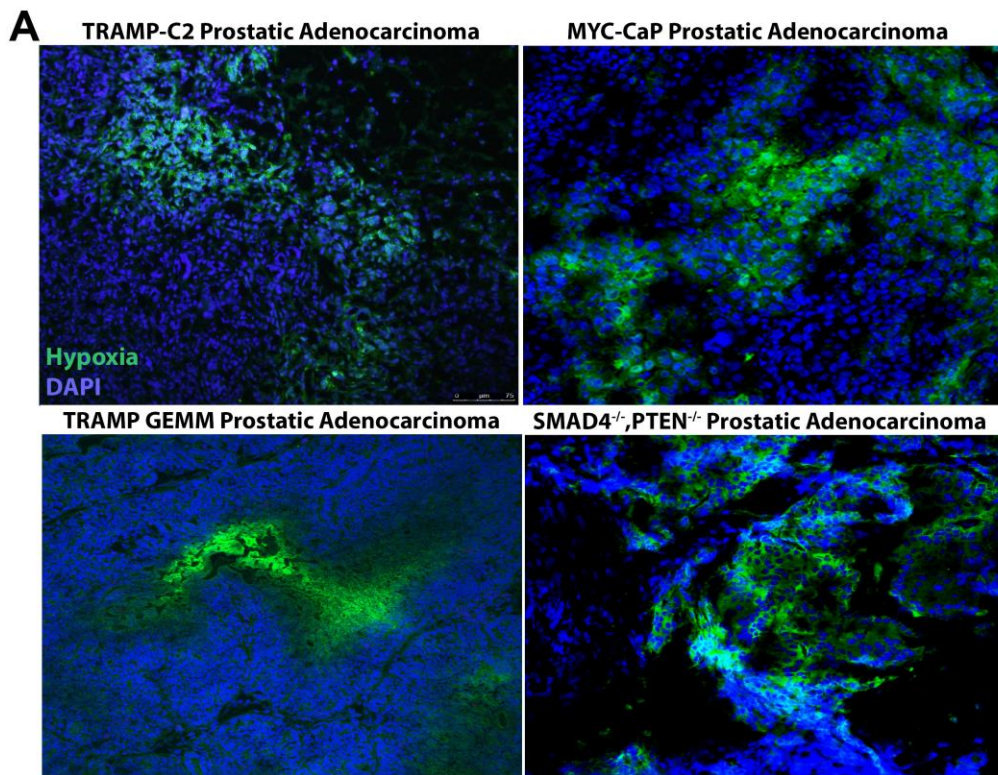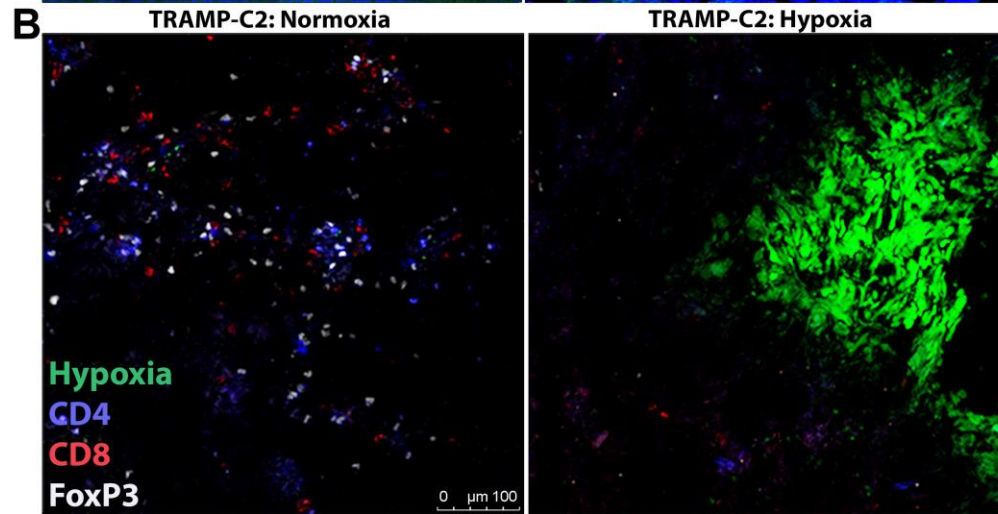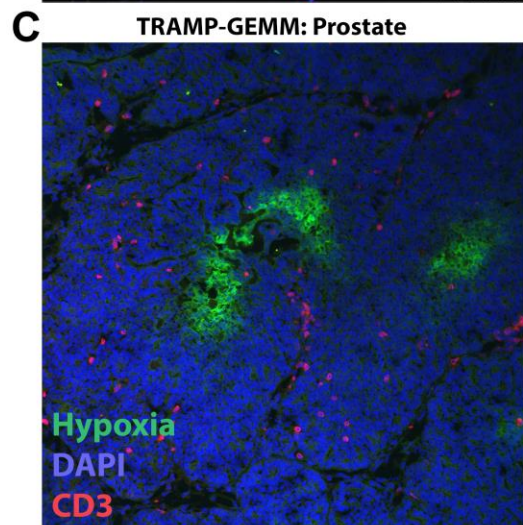

**Supplementary Figure 1.** *Hypoxic zones of prostate tumors are prevalent and poorly infiltrated by T cells.* **(A)** Immunofluorescence staining of s.c. implanted TRAMP-C2 and MyC-CaP tumors (top), as well as spontaneous prostate tumors from a 36-week old TRAMP mouse and a 26-week old Pb-Cre4, Pten<sup>pc-/-</sup>-Smad4<sup>pc-/-</sup> mouse (bottom) are shown **(B)** T cell infiltration under normoxia and hypoxia in an untreated TRAMP-C2 tumor and a TRAMP prostate from a 36 week old mouse **(C)** are shown. Pimonidazole was used to detect hypoxia. Hypoxia (green), CD4 (blue), CD8 (Red), and FoxP3 (White) are shown.

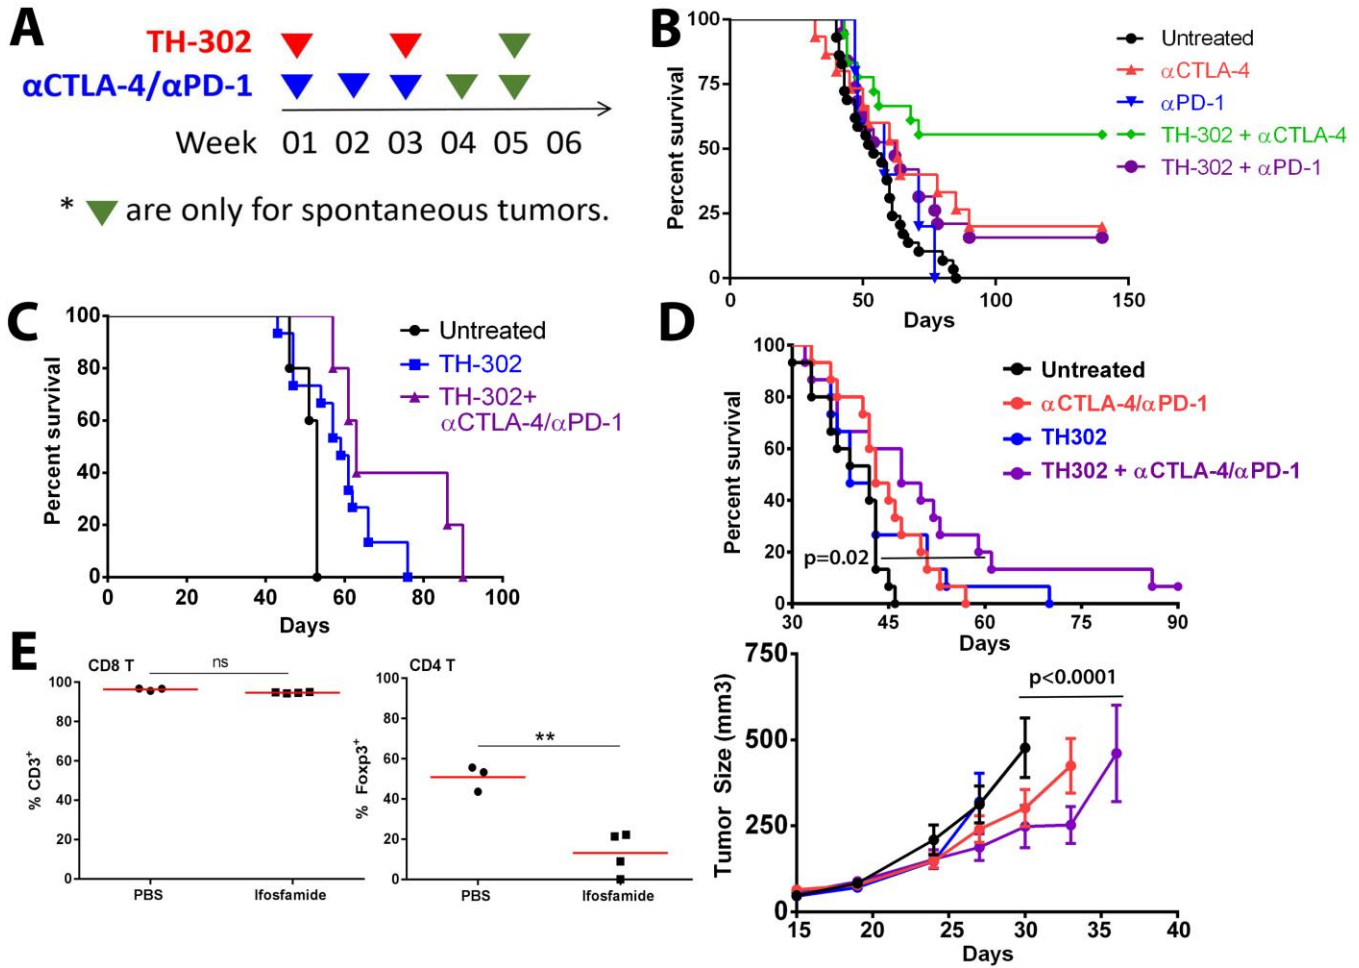

**Supplementary Figure 2. Hypoxia-targeted therapy and checkpoint blockade in the TRAMP-C2 and MyC-CaP models.** (A) The treatment schedule for TH-302 and checkpoint blockade is shown in blue and red for transplantable tumors (e.g. TRAMP-C2) with additions in green for spontaneous models (e.g. TRAMP mice). (B) C57BL/6J mice bearing 7-day pre-implanted TRAMP-C2 ( $1 \times 10^6$ ) tumors were treated with 2 cycles of TH-302 and/or  $\alpha$ CTLA-4 (9H10) or  $\alpha$ PD-1 (RMP1-14) antibody and monitored for survival for 140 days (5-10m/group,  $n=2-3$ , 5 for untreated). Survival differences were tested using the log-rank (Mantel-Cox) test. (C) B6.RAG<sup>-/-</sup> mice bearing 7-day pre-implanted TRAMP-C2 tumors were treated as in (A) and monitored for survival (5-10m/group,  $n=1-2$ ). (D) FVB/N mice bearing 21-day pre-implanted MyC-CaP ( $2 \times 10^5$ ) tumors were treated with 2 cycles of TH-302 and/or  $\alpha$ CTLA-4/ $\alpha$ PD-1 antibody and monitored for survival and tumor growth for 90 days (5m/group,  $n=3$ ). (E) OT-1 transgenic mice were treated with Ifosfamide (50 mg/kg) for 1 cycle of therapy. The day after conclusion of therapy, mice were euthanized and their splenocytes activated in the presence of IL-2 and OVA SIINFEKL peptide for 48 hours. Percent of CD3<sup>+</sup>CD8<sup>+</sup> T cells and CD3<sup>+</sup>CD4<sup>+</sup>Foxp3<sup>+</sup> Tregs are shown (3m/group,  $n=1$ ).

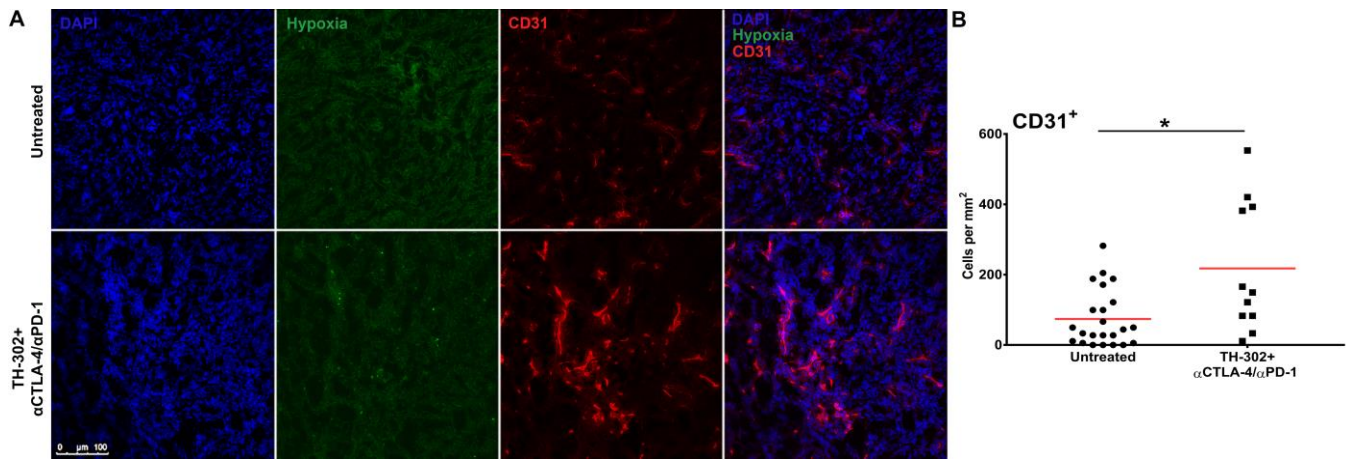

**Supplemental Figure 3.** *Hypoxia ablation and checkpoint blockade together promote accumulation of CD31<sup>+</sup> endothelial cells.* (A) Mice bearing 14-day pre-implanted TRAMP-C2 tumors were treated with one cycle of TH-302 and antibody therapy. Tumors were isolated, OCT mounted, frozen, sectioned, fixed, and stained for nuclei (DAPI), hypoxia by pimonidazole (FITC), and CD31 (Alexa 647). (B) Quantification of CD31<sup>+</sup> cells per mm<sup>2</sup>. Statistical significance between groups was determined by unpaired t test. ns = not significant \* = P<0.05, \*\* = P<0.01, \*\*\* = P<0.001, \*\*\*\* = P<0.0001.

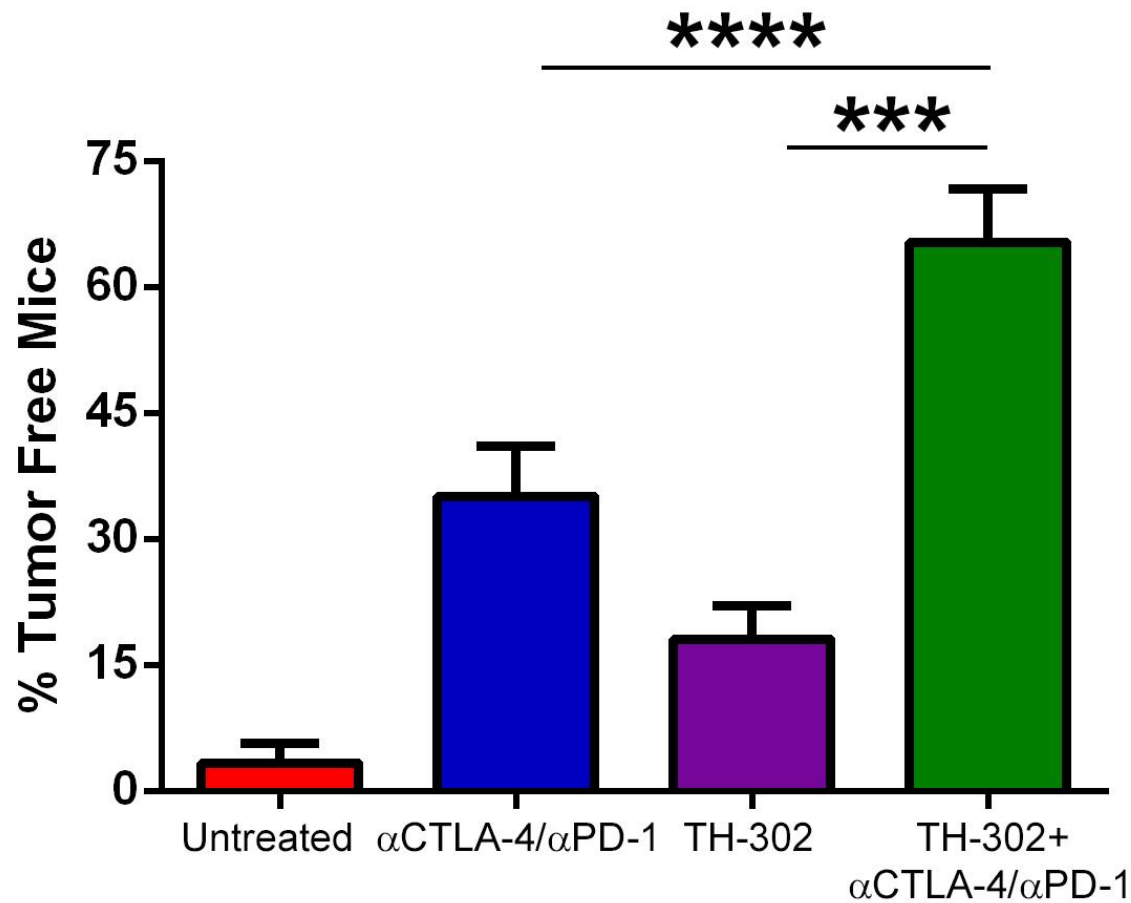

**Supplementary Figure 4.** Therapeutic response of two-week pre-implanted TRAMP-C2 tumors to hypoxia-targeted therapy and checkpoint blockade. C57BL/6J mice bearing 14-day pre-implanted TRAMP-C2 tumors were treated with two cycles of TH-302 and/or dual checkpoint antibody therapy. Percent of mice tumor free following 2 cycles of therapy (Day 32) is shown. Statistical significance between groups was determined by ANOVA. ns = not significant \* =  $P < 0.05$ , \*\* =  $P < 0.01$ , \*\*\* =  $P < 0.001$ , \*\*\*\* =  $P < 0.0001$ .



## A - Population Gating

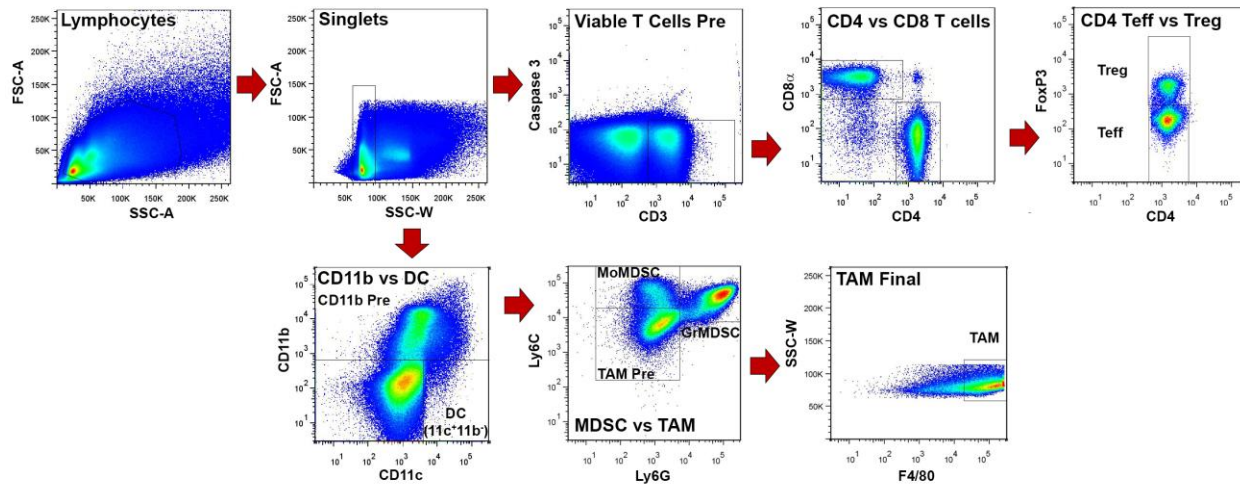

## B - Myeloid Phenotype

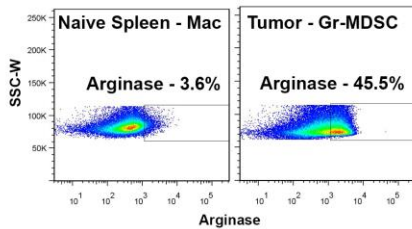

## C - T cell Phenotype

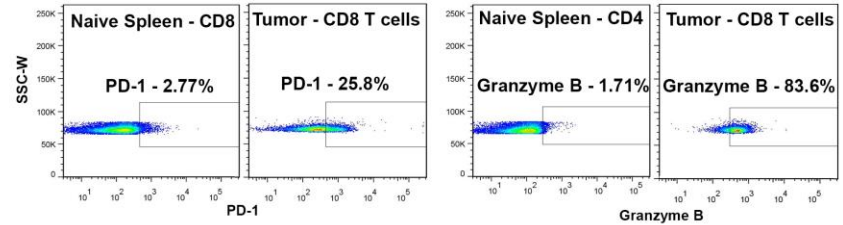

**Supplemental Figure 5. Flow cytometry gating schema and example controls. (A)** Debris and doublets/aggregates were removed. Viable  $CD3^+$  T cells were further divided into  $CD4^+CD8^-$  and  $CD8^+CD4^-$  T cells.  $CD4^+CD8^-$  T cells were divided into  $CD4^+Foxp3^-$  Teffs and  $CD4^+Foxp3^+$  Tregs. MoMDSC were defined as  $CD11b^+Ly6C^+Ly6G^-$ , DC as  $CD11c^+CD11b^-$ , Gr-MDSC as  $CD11b^+Ly6C^+Ly6G^+$ , and TAM as  $CD11b^+Ly6C^{low}Ly6G^-F4/80^+$ . **(B)** Representative flow plot showing Arginase gating in Gr-MDSC and **(C)** Representative flow plot showing gating of PD-1 and Granzyme-B in CD8 T cells versus control populations from naïve mouse spleen.

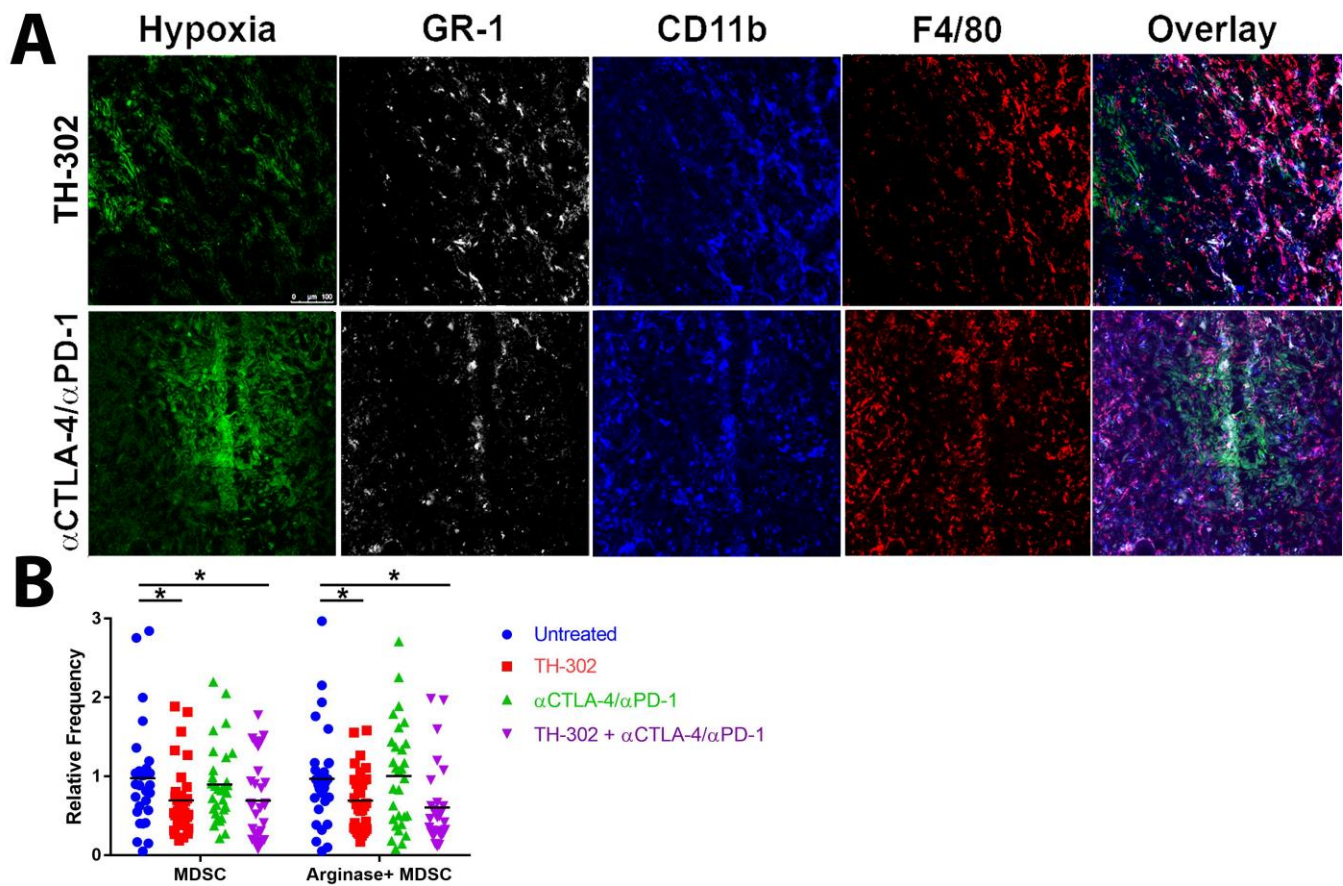

**Supplemental Figure 6.** *Impact of TH-302 or checkpoint antibody therapy on TRAMP-C2 myeloid stroma.* (A) 2-week pre-established TRAMP-C2 tumors were treated with TH-302 or checkpoint blockade and then tumors were isolated, fixed, embedded in OCT, sectioned, and stained with anti-pimonidazole (FITC), Gr-1 (V450), CD11b (Alexa 546), and F4/80 (Alexa 647). (B) The frequencies of CD11b<sup>+</sup>Gr-1<sup>+</sup> and CD11b<sup>+</sup>Gr-1<sup>+</sup>Arginase<sup>+</sup> MDSC relative to untreated animals are shown for all individual mice from 5 independent experiments. Statistical significance between groups was determined by ANOVA. ns = not significant \* = P<0.05, \*\* = P<0.01, \*\*\* = P<0.001, \*\*\*\* = P<0.0001.



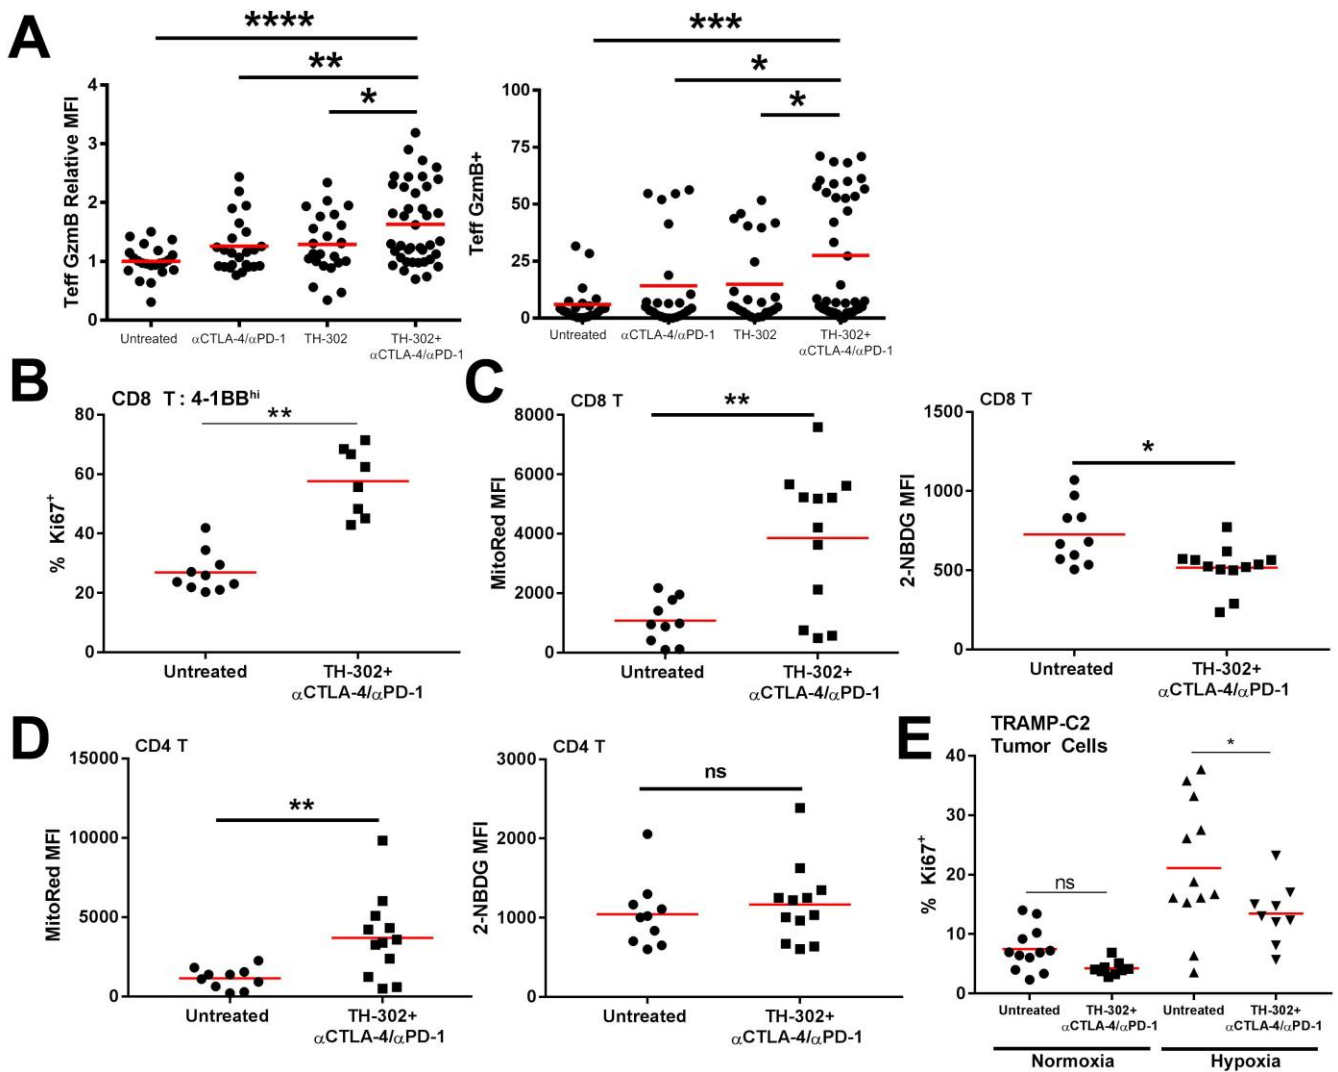

**Supplemental Figure 7.** TH-302 in combination with checkpoint blockade augments T cell effector function and diminishes TRAMP-C2 tumor cell proliferation. (A) Mice were implanted with TRAMP-C2 tumors in 30% Matrigel and treated beginning on day 14 for 2 cycles of therapy. One day following therapy, tumor infiltrating lymphocytes were purified and analyzed by flow cytometry. Expression of Granzyme B by CD4 T cells is shown for individual mice from 5 independent experiments. (B) TCR $\beta^+$ CD8<sup>+</sup> T cell proliferation was assessed by Ki67 staining. (C) Mice bearing 14-day pre-implanted TRAMP-C2 tumors were treated with 1 cycle of TH-302 and  $\alpha$ CTLA-4/ $\alpha$ PD-1 antibody. The day after conclusion of therapy, mice were injected intravenously with 2-NBDG (Cayman Chemical) 30 minutes before they were sacrificed and tumors were harvested. Flow cytometric analysis of glycolysis and oxidative phosphorylation on CD8 and (D) CD4 T cells. (E) Proliferation of TRAMP-C2 tumor cells after treatment with TH-302 and checkpoint blockade was assessed by Ki67 staining. Statistical significance between groups was determined by ANOVA for A and Student's t-test for B-E. ns = not significant \* = P<0.05, \*\* = P<0.01, \*\*\* = P<0.001, \*\*\*\* = P<0.0001.

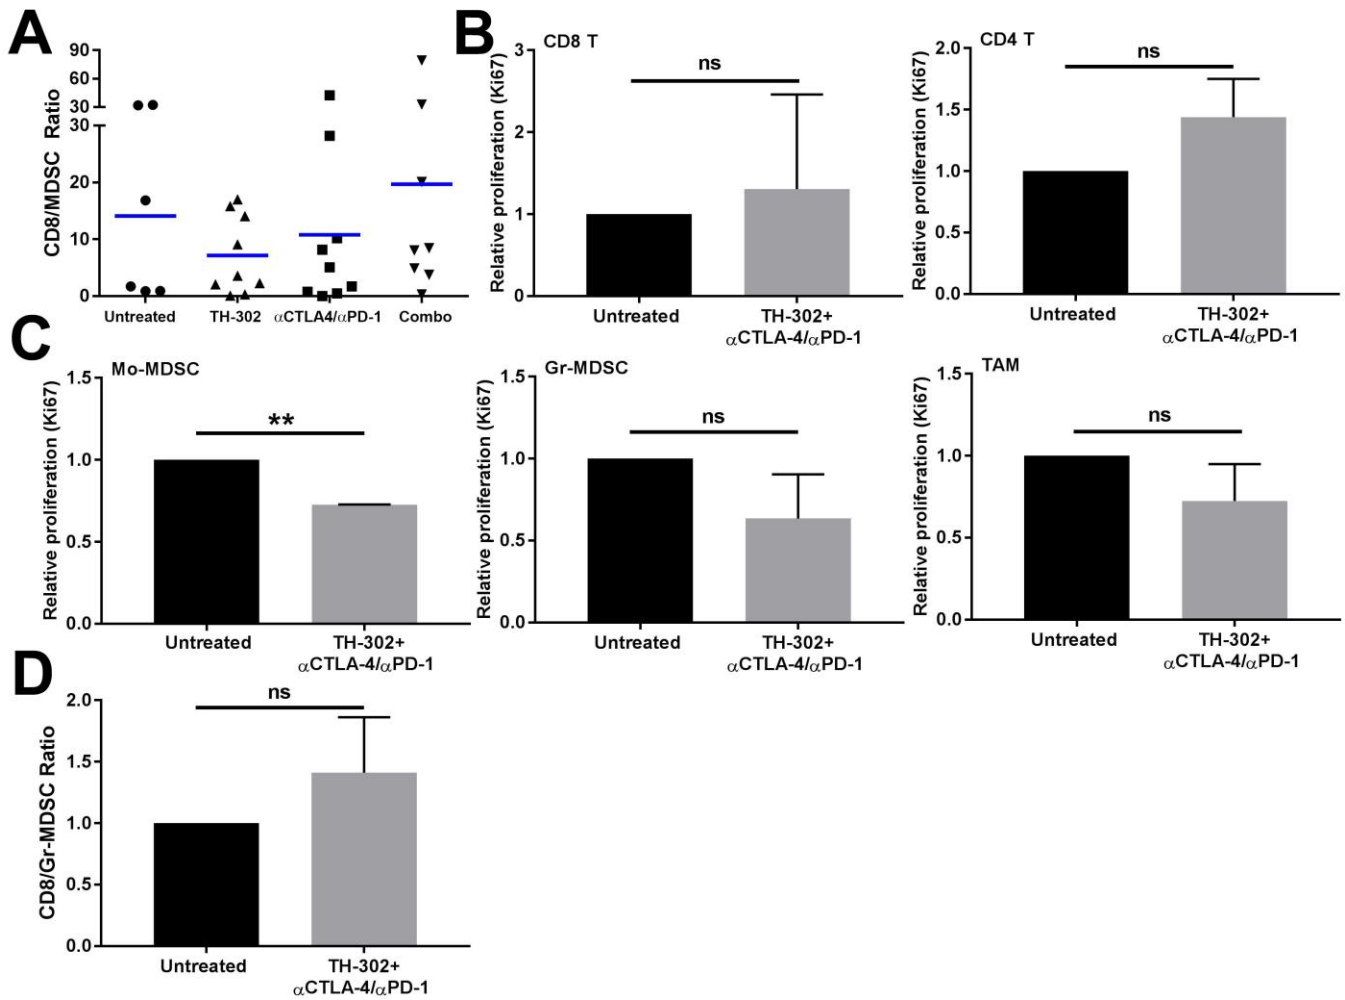

**Supplemental Figure 8.** Impact of combination TH-302 and checkpoint blockade on the immune microenvironment of TRAMP transgenic mice. **(A)** TRAMP mice were treated at 16 weeks with 3 cycles of TH-302 and/or αCTLA-4 (9H10)/αPD-1 (RMP1-14) antibody and euthanized at 36 weeks. The intratumoral ratios of CD3<sup>+</sup>CD8<sup>+</sup> T cells versus CD11b<sup>+</sup>Gr-1<sup>+</sup> MDSC are shown for individual mice from 3 independent experiments of 1-5m/group. Statistical significance between groups was determined by ANOVA. ns = not significant \* = P<0.05, \*\* = P<0.01, \*\*\* = P<0.001, \*\*\*\* = P<0.0001. **(B)** 30-week old TRAMP mice were treated with TH-302 (50 mg/kg) for 9 days with αCTLA-4/αPD-1 antibodies administered on days 1,3,4,7 and 9 and tumor-infiltrating cells purified for analysis on day 10. Proliferation of viable tumor-infiltrating TCRβ<sup>+</sup>CD8<sup>+</sup> T cells and TCRβ<sup>+</sup>CD4<sup>+</sup>Foxp3<sup>+</sup> T cells as well as that of **(C)** Mo-MDSC (CD11b<sup>+</sup>Ly6G<sup>-</sup>Ly6C<sup>+</sup>), Gr-MDSC (CD11b<sup>+</sup>Ly6G<sup>+</sup>Ly6C<sup>-</sup>) and TAM (CD11b<sup>+</sup>Ly-6G<sup>-</sup>Ly6C<sup>-/low</sup>F4/80<sup>+</sup>) was assessed by Ki67 staining. (3m/group, n=2). **(D)** The intratumoral ratios of CD3<sup>+</sup>CD8<sup>+</sup> T cells versus Gr-MDSC are shown for the mice in **B**. Statistical significance between groups was determined by Student's t test. ns = not significant \* = P<0.05, \*\* = P<0.01, \*\*\* = P<0.001, \*\*\*\* = P<0.0001. Error bars in B-D are mean ± S.D.
